# Supplementary material
Source: publisher site journal article supplement (https://www.dovepress.com/article/460155)
Supplement: Supplementary file 1 [file get_supplementary_file.php]

| **Table S1** Drug resistance gene primer and annealing temperature | | | |
| --- | --- | --- | --- |
| Gene | Primer sequence（5’-3’） | length （bp） | annealing temperature |
| KPC | F:CGTCTAGTTCTGCTGTCTTG | 798 | 52℃ |
| R: CTTGTCATCCTTGTTAGGCG |
| VIM | F: GATGGTGTTTGGTCGCATA | 390 | 52℃ |
| R: CGAATGCGCAGCACCAG |
| IMP | F: GGAATAGAGTGGCTTAAYTCTC | 232 | 52℃ |
| R: GGTTTAAYAAAACAACCACC |
| NDM | F: GAAGCTGAGCACCGCATTAG | 758 | 58℃ |
| R: GGGCCGTATGAGTGATTGC |
| OXA-48 | F: TTGGTGGCATCGATTATCGG | 743 | 62℃ |
| R: GAGCACTTCTTTTGTGATGGC |
| SHV | F: AAGATCCACTATCGCCAGCAG | 300 | 58℃ |
| R: ATTCAGTTCCGTTTCCCAGCGG |
| TEM | F:GAGTATTCAACATTTCCGTGTC | 850 | 58℃ |
| R: TAATCAGTGAGGCACCTATCTC |
| CTX-M1 | F: CAGCGCTTTTGCCGTCTAAG | 945 | 62℃ |
| R: GGCCCATGGTTAAAAAATCACTGC |
| CTX-M2 | F: CTCAGAGCATTCGCCGCTCA | 848 | 59℃ |
| R: CCGCCGCAGCCAGAATATCC |
| CTX-M8 | F: ACTTCAGCCACACGGATTCA | 1024 | 58℃ |
| R: CGAGTACGTCACGACGACTT |
| CTX-M9 | F: GTTACAGCCCTTCGGCGATGATTC | 881 | 64℃ |
| R: GCGCATGGTGACAAAGAGAGTGCAA |
| DHA | F: AACTTTCACAGGTGTGCTGGGT | 405 | 55℃ |
| R: CCGTACGCATACTGGCTTTGC |
| CMY | F: TGGCCAGAACTGACAGGCAAA | 462 | 58℃ |
| R: TTTCTCCTGAACGTGGCTGGC |
| pmrA | F: GCAACCGCTTCCCGTACCTC | 1030 | 58℃ |
| R: CGGTATTTCCGCGCACTGTC |
| pmrB | F: GAGGATAGCGCCCATGCAAA | 1310 | 56℃ |
| R: AACGAGCCGGCGACCAATAC |
| phoP | F: ATGCCGTAGGCCAGGGAGAG | 964 | 55℃ |
| R: CCGCTGGGCGTTTACTGA |
| phoQ | F: CGTTCGATAAAGTCGGGCCA | 1716 | 54℃ |
| R: GCGAGAAAGCCACACCATCG |
| mgrB | F: CAGCCAGCGATGCCAGATTT | 380 | 56℃ |
| R: CCTGGCGTGATTTTGACACGA |
| mcr-1 | F: AGTCCGTTTGTTCTTGTGGC | 320 | 58℃ |
| R: AGATCCTTGGTCTCGGCTTG |
| Y stands for C or T | | | |

| **Table S2** Comparison of drug-resistant genotype detection rates in children and adults | | | | | | | |
| --- | --- | --- | --- | --- | --- | --- | --- |
| Drug resistant gene | Children（n=31） | |  | Adult（n=31） | | χ2 | *P*-value |
| （n，%） | |  | （n，%） | |
| Carbapenems |  |  |  |  |  |  |  |
| NDM-5 | 18 | 58.06 |  | 0 | 0.00 | 25.364 | 0.000*** |
| KPC-2 | 6 | 19.35 |  | 27 | 87.10 | 28.571 | 0.000*** |
| OXA-232 | 3 | 9.68 |  | 2 | 6.45 | 0.218 | 0.641 |
| NDM-1 | 2 | 6.45 |  | 5 | 16.13 | 1.449 | 0.229 |
| OXA-181 | 2 | 6.45 |  | 0 | 0.00 | 2.067 | 0.151 |
| NDM-5+OXA-181 | 2 | 6.45 |  | 0 | 0.00 | 2.067 | 0.151 |
| KPC-2+NDM-1 | 0 | 0.00 |  | 3 | 9.68 | 3.153 | 0.076 |
| SHV | 27 | 87.10 |  | 31 | 100.00 | 4.276 | 0.039* |
| SHV-11 | 7 | 22.58 |  | 4 | 12.90 | 0.995 | 0.319 |
| SHV-262 | 6 | 19.35 |  | 0 | 0.00 | 6.643 | 0.010* |
| SHV-28 | 3 | 9.68 |  | 2 | 6.45 | 0.218 | 0.641 |
| SHV-1 | 2 | 6.45 |  | 1 | 3.23 | 0.350 | 0.554 |
| SHV-123 | 2 | 6.45 |  | 0 | 0.00 | 2.067 | 0.151 |
| SHV-8 | 1 | 3.23 |  | 0 | 0.00 | 1.016 | 0.313 |
| SHV-26 | 1 | 3.23 |  | 0 | 0.00 | 1.016 | 0.313 |
| SHV-27 | 1 | 3.23 |  | 0 | 0.00 | 1.016 | 0.313 |
| SHV-31 | 1 | 3.23 |  | 5 | 16.13 | 2.952 | 0.086 |
| SHV-82 | 1 | 3.23 |  | 0 | 0.00 | 1.016 | 0.313 |
| SHV-83 | 1 | 3.23 |  | 0 | 0.00 | 1.016 | 0.313 |
| SHV-251 | 1 | 3.23 |  | 0 | 0.00 | 1.016 | 0.313 |
| SHV-12 | 0 | 0.00 |  | 7 | 22.58 | 7.891 | 0.005** |
| SHV-123 | 0 | 0.00 |  | 5 | 16.13 | 5.439 | 0.020* |
| SHV-172 | 0 | 0.00 |  | 2 | 6.45 | 2.067 | 0.151 |
| SHV-2A | 0 | 0.00 |  | 1 | 3.23 | 1.016 | 0.313 |
| SHV-56 | 0 | 0.00 |  | 1 | 3.23 | 1.016 | 0.313 |
| SHV-96 | 0 | 0.00 |  | 1 | 3.23 | 1.016 | 0.313 |
| SHV-128 | 0 | 0.00 |  | 1 | 3.23 | 1.016 | 0.313 |
| SHV-228 | 0 | 0.00 |  | 1 | 3.23 | 1.016 | 0.313 |
| TEM | 5 | 16.13 |  | 27 | 87.10 | 31.258 | 0.000*** |
| TEM-1 | 4 | 12.90 |  | 17 | 54.84 | 12.170 | 0.000*** |
| TEM-117 | 1 | 3.23 |  | 0 | 0.00 | 1.016 | 0.313 |
| TEM-55 | 0 | 0.00 |  | 2 | 6.45 | 2.067 | 0.151 |
| TEM-84 | 0 | 0.00 |  | 2 | 6.45 | 2.067 | 0.151 |
| TEM-103 | 0 | 0.00 |  | 2 | 6.45 | 2.067 | 0.151 |
| TEM-163 | 0 | 0.00 |  | 2 | 6.45 | 2.067 | 0.151 |
| TEM-183 | 0 | 0.00 |  | 1 | 3.23 | 1.016 | 0.313 |
| TEM-198 | 0 | 0.00 |  | 1 | 3.23 | 1.016 | 0.313 |
| CTX-M-1group | 10 | 32.26 |  | 5 | 16.13 | 2.199 | 0.138 |
| CTX-M-15 | 7 | 22.58 |  | 0 | 0.00 | 7.891 | 0.005** |
| CTX-M-3 | 1 | 3.23 |  | 0 | 0.00 | 1.016 | 0.313 |
| CTX-M-88 | 1 | 3.23 |  | 0 | 0.00 | 1.016 | 0.313 |
| CTX-M-107 | 1 | 3.23 |  | 4 | 12.90 | 1.958 | 0.162 |
| CTX-M-69 | 0 | 0.00 |  | 1 | 3.23 | 1.016 | 0.313 |
| CTX-M-9group | 3 | 9.68 |  | 21 | 67.74 | 22.026 | 0.000*** |
| CTX-M-14 | 1 | 3.23 |  | 0 | 0.00 | 1.016 | 0.313 |
| CTX-M-113 | 1 | 3.23 |  | 0 | 0.00 | 1.016 | 0.313 |
| CTX-M-65 | 1 | 3.23 |  | 16 | 51.61 | 18.235 | 0.000*** |
| CTX-M-17 | 0 | 0.00 |  | 2 | 6.45 | 2.067 | 0.151 |
| CTX-M-27 | 0 | 0.00 |  | 1 | 3.23 | 1.016 | 0.313 |
| CTX-M-99 | 0 | 0.00 |  | 1 | 3.23 | 1.016 | 0.313 |
| CTX-M-130 | 0 | 0.00 |  | 1 | 3.23 | 1.016 | 0.313 |
| DHA | 8 | 25.81 |  | 4 | 12.90 | 1.653 | 0.199 |
| DHA-1 | 0 | 0.00 |  | 4 | 12.90 | 4.276 | 0.039* |
| DHA-3 | 8 | 25.81 |  | 0 | 0.00 | 9.185 | 0.002** |
| Note: * is a *P* value < 0.05, ** is P value <0.01, *** is P value <0.001. The difference is statistically significant. | | | | | | | |
